# Supplementary material for: Porous PtPd alloy nanotubes: towards high performance electrocatalysts with low Pt-loading
Source: Royal Society of Chemistry journal article supplement (doi:10.1039/c9cy01145e), 2019-01-01
Supplement: c9cy01145e1.pdf [file c9cy01145e1.pdf]

## Supplementary Information

### **Porous PtPd alloy nanotubes. Towards high performance electrocatalysts with low Pt-loading**

Ayoub Laghrissi<sup>a</sup> and Mohammed Es-Souni \*<sup>a</sup>

<sup>a</sup> Institute for Materials & Surface Technology, University of Applied Sciences, Kiel, Germany

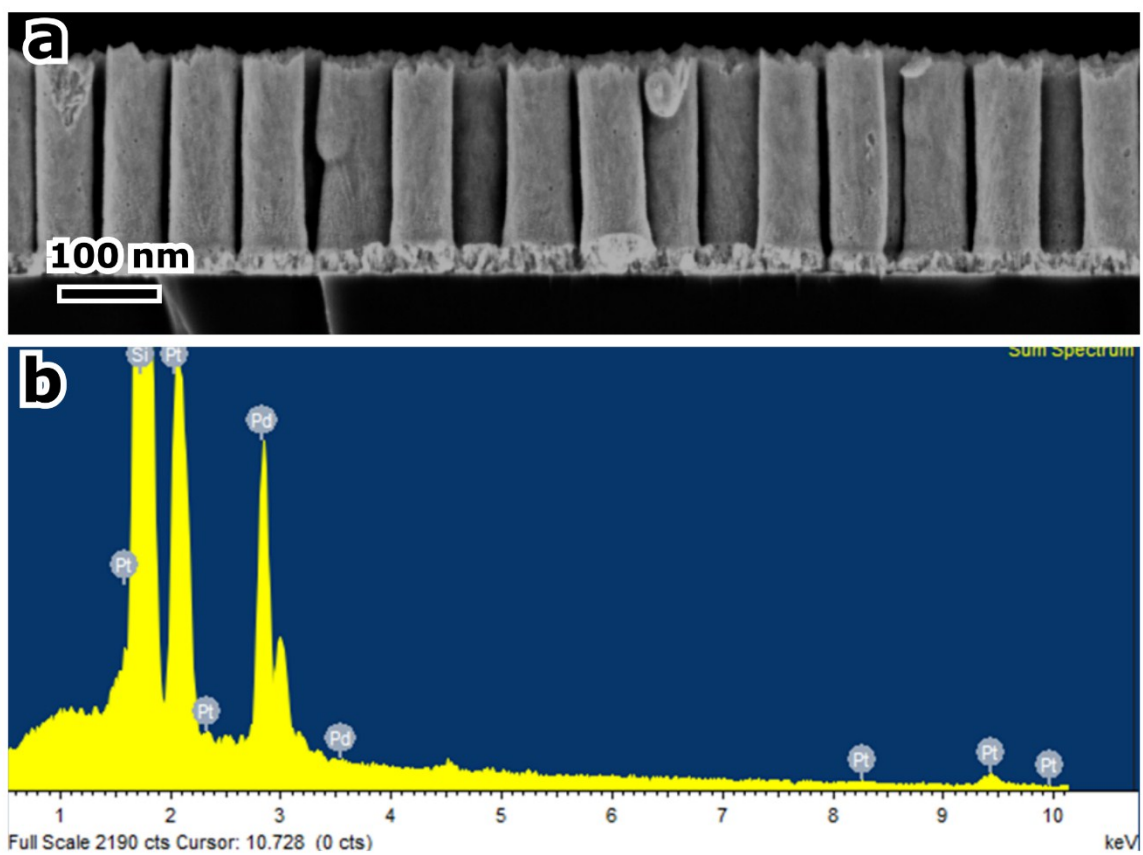

**Fig. S1** SEM micrograph showing a cross section of a PtPd alloy NRs sample (a) , and corresponding EDS spectrum (b).

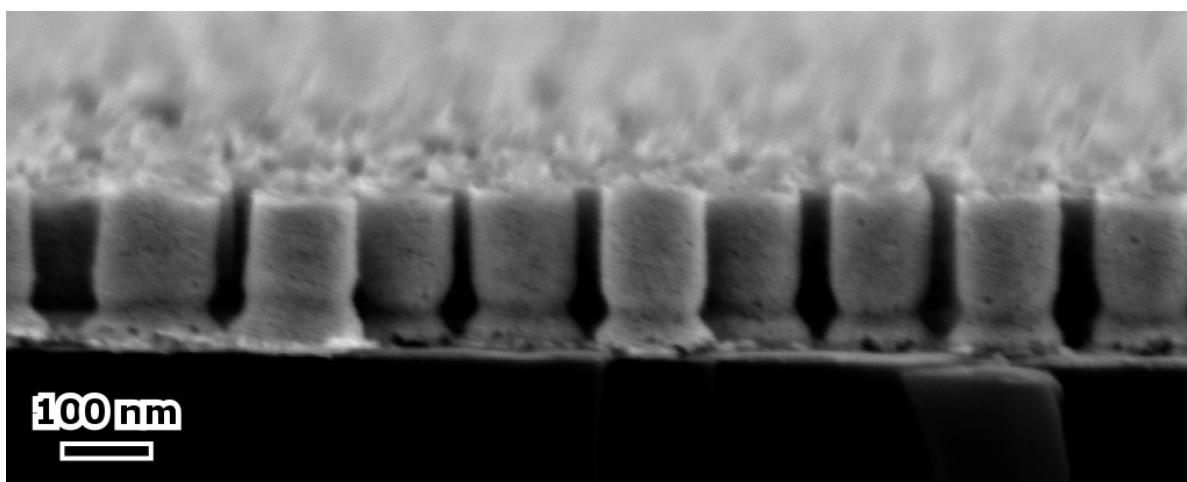

**Fig. S2** Cross-section of Pt array electrodeposited at -0.5 V with no Brij58 in the solution.

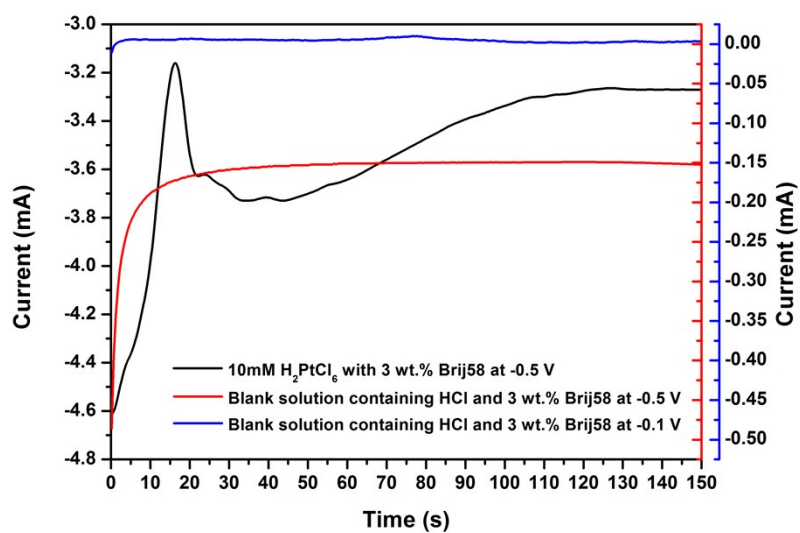

**Fig. S3** The chronoamperometric curves corresponding to the potentiostatic electrodeposition of the porous Pt NTs at -0.5 V, and hydrogen evolution test done in a blank solution containing HCl and 3 wt.% Brij58 ( pH=2.5) at -0.1 V and -0.5 V.

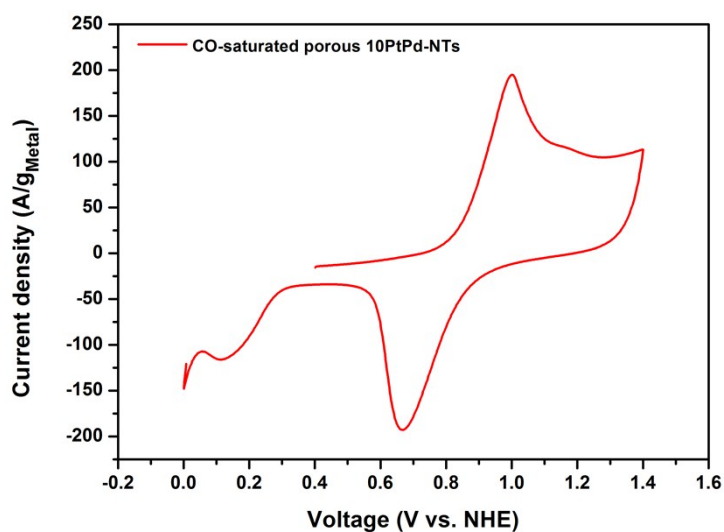

**Fig. S4** CO oxidation voltammogram of a CO-saturated porous 10PtPd-NTs in CO-free 0.5 M  $H_2SO_4$  electrolyte. Scan rate:  $50\text{ mV s}^{-1}$ .

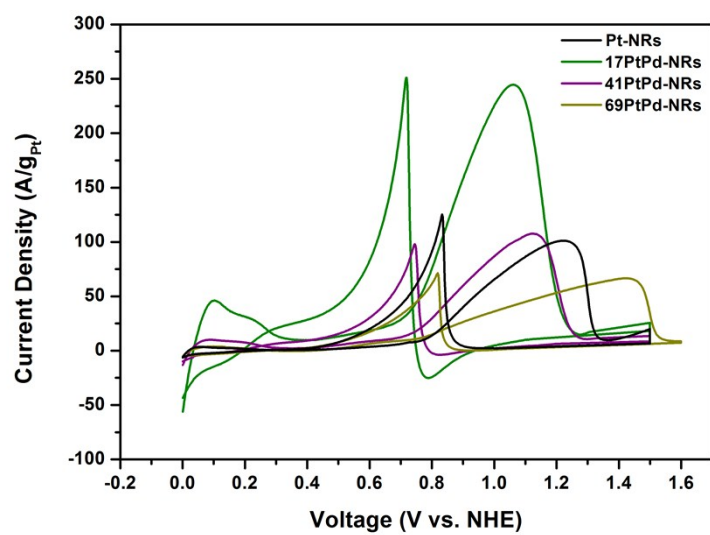

**Fig. S5** Current density (current normalized by the Pt-mass) vs. voltage of the plain PtPd-NRs containing different Pt-contents in 0.5 M H<sub>2</sub>SO<sub>4</sub> + 0.5 M CH<sub>3</sub>OH. Scan rate: 50 mV s<sup>-1</sup>.

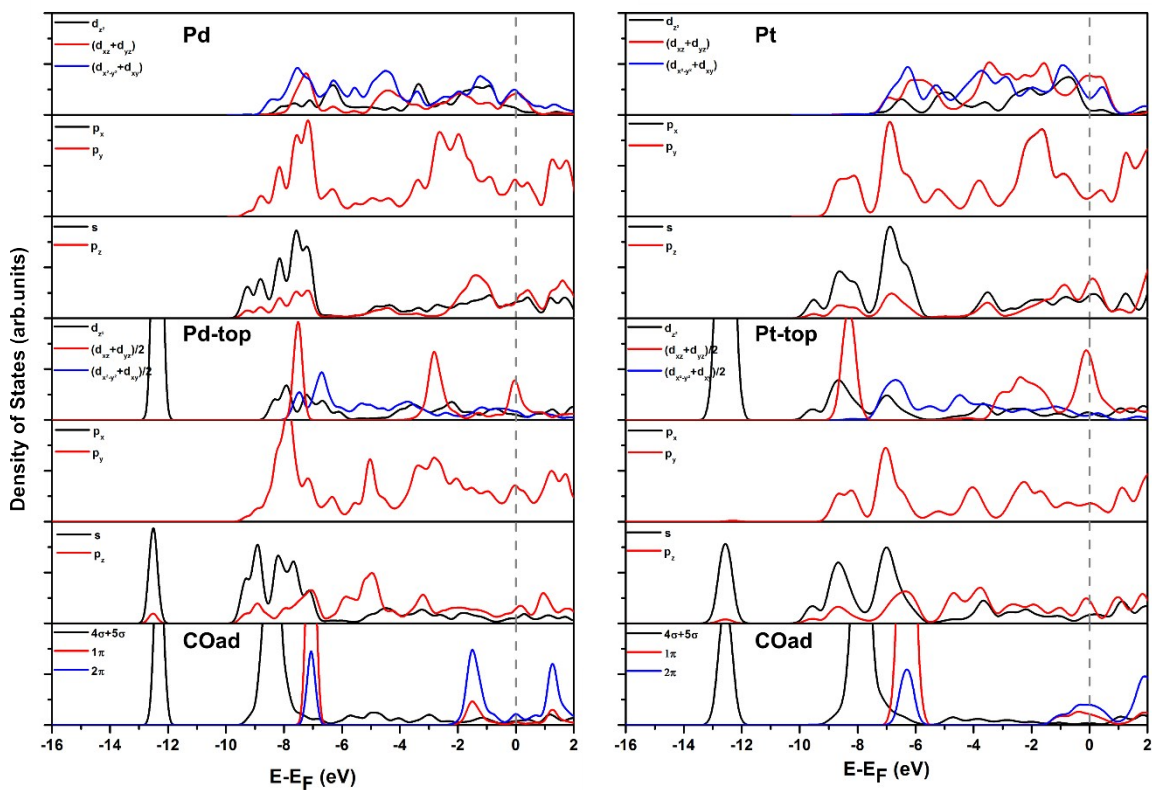

**Fig. S6** Orbital electronic density of states for top sites of pure Pt, and Pd atoms, and adsorbed CO. This Figure shows s, p, and d –states for pure Pd and Pt. The d band center is -2.41 eV for Pt and -1.94 eV for Pd, the s- and p-band are covering a large energy range.  $p_x$  and  $p_y$  degenerate, and the  $p_z$  show different behavior than later ones. Considering the effect of CO molecule on the metal states Pd and Pt, one can observe different qualitative behaviors, the d-band is extended to a large energy range; more important new states were a rise in  $d_{z^2}$  and  $sp_z$  from the interaction with  $\sigma$ . For CO the  $4\sigma+5\sigma$  peaks positions for Pt (-8.5 eV) and Pd (-8 eV), the  $2\pi$  get partially occupied at the same energy level with  $1\pi$ .

**Table S1** Volume fractions of 10 mM H<sub>2</sub>PtCl<sub>6</sub> and 10 mM K<sub>2</sub>PdCl<sub>4</sub> aqueous electrolytes, and their corresponding Pt-content obtained from EDS analysis, and from XRD (the calculated lattice parameters and Vegard's law).

| Volume Fraction | Pt-Content from EDS (at%) | Pt-Content from XRD (at%) |
|-----------------|---------------------------|---------------------------|
| Porous PtPd NTs |                           |                           |
| 1:19            | 5.5                       | 5                         |
| 2:18            | 10.54                     | 10                        |
| 3:16            | 17.44                     | 18                        |
| 4:16            | 22.40                     | 23                        |
| 7:12            | 49.04                     | 43                        |
| Plain PtPd NRs  |                           |                           |
| 1:4             | 10.78                     | 17                        |
| 4:5             | 42.24                     | 41                        |
| 7:4             | 68.51                     | 69                        |
